# Supplementary material for: CQSO-20: 20-item Compassion Questionnaires
Source: Research Square preprint supplement (doi:10.21203/rs.3.rs-6812992/v1), 2025-07-16
Supplement: Supplementary file 1 [file 2615546d20cbf6e70526bb1b.docx]

**APPENDIX A**

**Compassion Questionnaire-Self - 20 items (CQS-20)**

**Instructions**: Listed below is a collection of statements about your everyday experiences. Please read each statement carefully, and using the scale below, please indicate how often you experience each of the following. Please answer according to what accurately reflects your experience rather than what you think your experience should be.

**(1) Almost Never**

**(2) Rarely**

**(3) Sometimes**

**(4) Often**

**(5) Almost Always**

1. I tend to decline help from others

2. When I struggle, I try to soothe my suffering

3. I take actions to ease my suffering during hard times

4. When I struggle, I accept help from others

5. I try to alleviate my suffering when I struggle

6. During hard times, I take actions to relieve my suffering

7. When I feel bad, I try to console myself

8. When I have a hard time, I think it is my fault

9. When I make a mistake, I judge myself harshly

10. I tend to reject care from others

11. I am patient with my shortcomings

12. I feel angry at myself when I struggle

13. I refrain of judging myself when making a mistake

14. I have hard time accepting help from others

15. I accept care from others when I need it

16. I can think I am good enough even after being rejected

17. I am open to receiving care when I need it

18. I feel disgusted by my errors

19. I am kind with myself when I am struggling

20. During difficult times, I try to relieve my pain

*Note. Each dimension is computed separately using the average of its items. The total score should be computed as the average of the three dimensions. R means the item is reverse scored.*

1. CQS (Thinking/Feeling Compassionately) = (CQS8R + CQS9R + CQS11 + CQS12R + CQS13 + CQS16 + CQSR18R + CQS19) / 8
2. CQS (Connection with Others) = (CQS1R + CQS4 + CQS10R + CQS14R + CQS15 + CQS17) / 6
3. CQS (Acting or Intention to Act Compassionately) = (CQS2 + CQS3 + CQS5 + CQS6 + CQS7 + CQS20) / 6

CQS (total score) = (CQS (Thinking/Feeling Compassionately) + CQS (Connection with Others) + CQS (Acting or Intention to Act Compassionately)) / 3

**Compassion Questionnaire-Others - 20 items (CQO-20)**

**Instructions**: Listed below is a collection of statements about your everyday experiences. Please read each statement carefully, and using the scale below, please indicate how often you experience each of the following. Please answer according to what accurately reflects your experience rather than what you think your experience should be.

**(1) Almost Never**

**(2) Rarely**

**(3) Sometimes**

**(4) Often**

**(5) Almost Always**

1. Common suffering makes me feel closer to other people during hard times

2. My suffering helps me connect with other people’s suffering

3. I judge others ruthlessly when they make a mistake

4. I try to alleviate the suffering of others when they struggle

5. During hard times, I take actions to relieve the suffering of others

6. I can feel positively towards others even after making a mistake

7. I feel annoyed at others when they don't understand things quickly

8. When someone is feeling bad, I try to soothe them

9. I am non-judgemental of other people’s failures

10. When someone fails, I think they deserve it

11. My struggles allow me to understand the struggles of others

12. I help others when they have a tough time

13. I notice the commonalities between my suffering and the suffering of others

14. During difficult times, I try to console others

15. I am accepting of other people’s mistakes

16. My difficulties make it easier to understand other people's difficulties

17. I am very forgiving of other people’s flaws and inadequacies

18. I take care of others when they are in need

19. When someone makes a mistake, I feel mad at them

20. My struggles do not help me relate to other people’s struggles

*Note. Each dimension is computed separately using the average of its items. The total score should be computed as the average of the three dimensions. R means the item is reverse scored.*

1. CQO (Thinking/Feeling Compassionately) = (CQO3R + CQO6 + CQO7R + CQO9 + CQO10R + CQO15 + CQO17 + CQO19R) / 8
2. CQO (Connection with Others) = (CQO1 + CQO2 + CQO11 + CQO11 + CQO16 + CQO20R) / 6
3. CQO (Acting or Intention to Act Compassionately) = (CQO4 + CQO5 + CQO8 + CQO12 + CQO14 + CQO18) / 6

CQO (total score) = (CQO (Thinking/Feeling Compassionately) + CQO (Connection with Others) + CQO (Acting or Intention to Act Compassionately)) / 3.
